## EXPRESSION OF CONCERN

# Expression of Concern: Impairment of FOS mRNA Stabilization Following Translation Arrest in Granulocytes from Myelodysplastic Syndrome Patients

The *PLOS ONE* Editors

The Funding Statement for this article [1] states that the study received funding from the Smoking Research Foundation, which according to [2] has received financial support from the tobacco industry. In light of this issue the *PLOS ONE* article [1] does not comply with the journal's policy on Funding from Tobacco Companies [3] which was implemented in 2010.

Therefore, the *PLOS ONE* Editors issue this Expression of Concern.

We regret that this concern was not identified and addressed prior to the article's [1] publication.

## References

1. Feng X, Shikama Y, Shichishima T, Noji H, Ikeda K, Ogawa K, et al. (2013) Impairment of FOS mRNA Stabilization Following Translation Arrest in Granulocytes from Myelodysplastic Syndrome Patients. *PLoS ONE* 8(4): e61107. <https://doi.org/10.1371/journal.pone.0061107> PMID: 23593403
2. Iida K, Proctor RN. (2018) 'The industry must be inconspicuous': Japan Tobacco's corruption of science and health policy via the Smoking Research Foundation. *Tobacco Control* 27:e3–e11. <https://doi.org/10.1136/tobaccocontrol-2017-053971> PMID: 29437992
3. <https://journals.plos.org/plosone/s/disclosure-of-funding-sources#loc-funding-from-tobacco-companies>

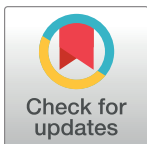

## OPEN ACCESS

**Citation:** The *PLOS ONE* Editors (2023) Expression of Concern: Impairment of FOS mRNA Stabilization Following Translation Arrest in Granulocytes from Myelodysplastic Syndrome Patients. *PLoS ONE* 18(1): e0278805. <https://doi.org/10.1371/journal.pone.0278805>

**Published:** January 11, 2023

**Copyright:** © 2023 The *PLOS ONE* Editors. This is an open access article distributed under the terms of the [Creative Commons Attribution License](https://creativecommons.org/licenses/by/4.0/), which permits unrestricted use, distribution, and reproduction in any medium, provided the original author and source are credited.
